# Supplementary material for: Breast Cancer Characteristics in the Population of Survivors Participating in the World Trade Center Environmental Health Center Program 2002–2019
Source: MDPI journal article supplement (doi:10.3390/ijerph18147555), 2021-07-15
Supplement: s1 [file s1]

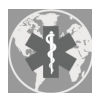

## Supplementary Materials

**Table S1.** Demographic characteristics of male patients in the WTC EHC with and without breast cancers as of 31 December 2019.

| Characteristic                            | Non-Cancer *<br>2704                               | Male Breast Cancer<br>Patients<br>9 | p-value |
|-------------------------------------------|----------------------------------------------------|-------------------------------------|---------|
| Age on 9/11, median (interquartile range) | 40.50 (32.60, 48.20)                               | 51.60 (45.30, 54.10)                | 0.03    |
| Age group on 9/11, n (%)                  | <20                                                | 0 (0)                               | 0.03    |
|                                           | 21–29                                              | 1 (11)                              |         |
|                                           | 30–39                                              | 1 (11)                              |         |
|                                           | 40–49                                              | 2 (22)                              |         |
|                                           | 50–59                                              | 3 (33)                              |         |
|                                           | 60–69                                              | 1 (11)                              |         |
|                                           | 70–79                                              | 1 (11)                              |         |
|                                           | ≥80                                                | 0 (0)                               |         |
| Race/Ethnicity, n (%)                     | Hispanic                                           | 0 (0)                               | 0.08    |
|                                           | Non-Hispanic white                                 | 8 (89)                              |         |
|                                           | Non-Hispanic black                                 | 0 (0)                               |         |
|                                           | Non-Hispanic Asian                                 | 1 (11)                              |         |
|                                           | Native American                                    | 0 (0)                               |         |
| BMI (Body Mass Index), n (%)              | Normal weight (<25)                                | 2 (25)                              | 0.97    |
|                                           | Overweight (25–30)                                 | 3 (38)                              |         |
|                                           | Obese (≥30)                                        | 3 (38)                              |         |
| Income, n (%)                             | ≤\$30,000/year                                     | 2 (22)                              | 0.09    |
|                                           | >\$30,000/year                                     | 7 (78)                              |         |
| Education, n (%)                          | High school or less                                | 1 (11)                              | 0.21    |
|                                           | More than high school                              | 8 (89)                              |         |
| Smoking status, n (%)                     | Never (≤1 pack-year)                               | 6 (67)                              | 0.99    |
|                                           | Former and current smokers (>1 pack-year, stopped) | 3 (33)                              |         |
| Smoking pack-years, n (%)                 | ≤5 pack-year                                       | 7 (78)                              | 0.99    |
|                                           | >5 pack-year                                       | 2 (22)                              |         |

\* Includes only those with signed consent, all % rounded. WTC EHC – World Trade Center Environmental Health Center.

**Table S2.** Breast cancer characteristics among male patients in the WTC EHC as of 31 December 2019.

| Characteristic                 | Male Breast Cancer Diagnoses          |        |
|--------------------------------|---------------------------------------|--------|
|                                | n (%)                                 |        |
|                                | n = 11 *                              |        |
| Laterality, n (%)              | Left                                  | 6 (55) |
|                                | Right                                 | 5 (45) |
| Grade, n (%)                   | G1. Well-differentiated               | 3 (27) |
|                                | G2. Moderately differentiated         | 5 (45) |
|                                | G3. Poorly differentiated             | 3 (27) |
| Histology, n (%)               | Ductal                                | 8 (73) |
|                                | Ductal in situ                        | 3 (27) |
| pT (Primary tumor), n (%)      | T0 (in situ)                          | 3 (27) |
|                                | T1 (<2.0 cm)                          | 6 (55) |
|                                | T2 (2.0–4.9 cm)                       | 2 (18) |
|                                | T3-T4 (≥5.0 cm)                       | 0 (0)  |
| pN-Regional lymph nodes, n (%) | N0. No regional lymph node metastasis | 7 (64) |
|                                | N1. Regional lymph node metastasis    | 2 (18) |
|                                | Unknown                               | 2 (18) |
| pM-Distant metastasis, n (%)   | M0. No distant metastasis             | 9 (82) |
|                                | M1. Distant metastasis                | 0 (0)  |
|                                | Unknown                               | 2 (18) |
| Stage, AJCC ** (%)             | 0                                     | 3 (27) |

|     |        |
|-----|--------|
| I   | 5 (45) |
| II  | 2 (18) |
| III | 1 (9)  |
| IV  | 0 (0)  |

\* Includes 2 additional second primary breast cancer diagnoses among 2 male patients with two primary breast cancer diagnoses. \*\* Because available SEER data did not report in situ breast cancer cases, Table 2 did not include 121 in situ breast cancer diagnoses in the WTC EHC for comparison purposes. WTC EHC—World Trade Center Environmental Health Center.

**Table S3.** Age-adjusted odds ratios (and 95% CIs) comparing female breast cancer cases vs. non-cancer controls using multiple logistic regression.

| Race/ethnicity (Hispanic as reference group)  | Odds Ratios | 95% Confidence Interval |
|-----------------------------------------------|-------------|-------------------------|
| Non-Hispanic White                            | 2.74        | (2.05, 3.70)            |
| Non-Hispanic Black                            | 2.18        | (1.60, 2.99)            |
| Asian or Native American                      | 3.43        | (2.40, 4.90)            |
| Income >\$30,000 /year vs. ≤\$30,000/year     | 1.74        | (1.42, 2.13)            |
| More than high school vs. High school or less | 1.29        | (1.04, 1.62)            |

Odds ratios are only calculated for significant characteristics in Table 1.
